# Supplementary material for: Differences in reproductive health discussions in an urban Hispanic population with SLE: lessons from the field
Source: HighWire-hosted journal article supplement (doi:10.1136/lupus-2023-001095), 2024-02-01
Supplement: lupus-2023-001095supp002_data_supplement.pdf [file lupus-2023-001095supp002_data_supplement.pdf]

Supplemental Table 1. Multivariable logistic regression with having had discussion about pregnancy plans ("One Key Question") in past year as outcome

| Variable                          | Estimate  | Odds Ratio (95% CI) | P-value |
|-----------------------------------|-----------|---------------------|---------|
| <b>Survey Language</b>            |           |                     |         |
| English                           | Reference | Reference           |         |
| Spanish                           | -0.564    | 0.57 (0.23 – 1.43)  | 0.231   |
| <b>Marital Status</b>             |           |                     |         |
| Never married                     | Reference | Reference           |         |
| Married/in a domestic partnership | -0.077    | 0.93 (0.36 – 2.41)  | 0.875   |
| Widowed                           | -15.189   | 0.001 (0.00 – inf)  | 0.988   |
| Divorced or separated             | 0.198     | 1.22 (0.35 – 4.25)  | 0.756   |
| <b>Age</b>                        | -0.099    | 0.91 (0.86 – 0.96)  | <0.001* |
| <b>Education</b>                  | -0.107    | 0.90 (0.57 – 1.42)  | 0.645   |

\*Significant at p&lt;0.05

- After adjusting for survey language, marital status, and education, for every one-year increase in the age, the odds of having a discussion regarding pregnancy plans in the past year was 9% lower (OR[95%CI]=0.91 [0.86-0.96]; p-value<0.001).

Supplemental Table 2. Multivariable logistic regression with having contraception discussion in the past year as outcome

| Variable                          | Estimate  | Odds Ratio (95% CI) | P-value |
|-----------------------------------|-----------|---------------------|---------|
| <b>Survey Language</b>            |           |                     |         |
| English                           | Reference | Reference           |         |
| Spanish                           | -1.718    | 0.18 (0.07 – 0.47)  | <0.001* |
| <b>Marital Status</b>             |           |                     |         |
| Never married                     | Reference | Reference           |         |
| Married/in a domestic partnership | 0.495     | 1.64 (0.59 – 4.58)  | 0.345   |
| Widowed                           | -15.868   | 0.001 (0.00 – inf)  | 0.992   |
| Divorced or separated             | 0.050     | 1.05 (0.28 – 3.89)  | 0.941   |
| <b>Age</b>                        | -0.069    | 0.93 (0.89 – 0.98)  | 0.009*  |
| <b>Education</b>                  | -0.155    | 0.86 (0.54 – 1.35)  | 0.504   |

\*Significant at p&lt;0.05

- After adjusting for age, education, and marital status, Spanish language participants had 82% lower odds (0.18 times lower) of having a discussion regarding contraception with their lupus doctor in the past one year (OR[95%CI]=0.18 [0.07-0.47]; p-value<0.001).

- After adjusting for survey language, marital status, and education, for every one-year increase in the age, the odds of having a discussion regarding contraception with their lupus doctor in the past year was 7% lower (OR[95%CI]=0.93 [0.89-0.98]; p-value=0.009).

Supplemental Table 3. Barriers by survey language group

| Variable                                                                                           | Survey Language Group |                       | Adjusted p-value |
|----------------------------------------------------------------------------------------------------|-----------------------|-----------------------|------------------|
|                                                                                                    | English Survey (n=86) | Spanish Survey (n=65) |                  |
| <b>What makes it hard to discuss contraception and pregnancy questions with your lupus doctor?</b> |                       |                       |                  |
| Not enough time in my appointment                                                                  | 5 (5.8%)              | 9 (13.9%)             | 0.693            |
| My lupus doctor suggested I talk to OB-GYN instead                                                 | 16 (18.6%)            | 11 (16.9%)            | 0.999            |
| There is a language barrier between doctor and me                                                  | 1 (1.2%)              | 0                     | 0.999            |
| I don't think my lupus doctor knows enough about contraception or pregnancy                        | 3 (3.5%)              | 2 (3.1%)              | 0.999            |
| I don't feel comfortable talking about these issues with my lupus doctor                           | 1 (1.2%)              | 2 (3.1%)              | 0.900            |
| I don't think it's safe for me to become pregnant                                                  | 19 (22.1%)            | 14 (21.5%)            | 0.999            |
| I don't think these topics are relevant or important to me                                         | 11 (12.8%)            | 4 (6.2%)              | 0.693            |
| Other                                                                                              | 5 (5.8%)              | 5 (7.7%)              | 0.990            |
| None                                                                                               | 36 (41.9%)            | 21 (32.3%)            | 0.639            |

Supplemental Table 4. Sources of information by survey language group

| Variable                                                                                  | Survey Language Group |                       | Adjusted p-value |
|-------------------------------------------------------------------------------------------|-----------------------|-----------------------|------------------|
|                                                                                           | English Survey (n=86) | Spanish Survey (n=65) |                  |
| <b>Where do you get most of your information regarding lupus and reproductive health?</b> |                       |                       |                  |
| My lupus doctor                                                                           | 59 (68.6%)            | 39 (60.0%)            | 0.601            |
| My OB-GYN                                                                                 | 24 (27.9%)            | 15 (23.1%)            | 0.776            |
| Another doctor                                                                            | 11 (12.8%)            | 3 (4.6%)              | 0.315            |
| Significant other                                                                         | 1 (1.2%)              | 5 (7.7%)              | 0.315            |
| Family member                                                                             | 4 (4.7%)              | 7 (10.8%)             | 0.572            |
| Friends                                                                                   | 1 (1.2%)              | 2 (3.1%)              | 0.776            |
| Lupus support group                                                                       | 7 (8.1%)              | 3 (4.6%)              | 0.777            |
| Information found on an internet site                                                     | 37 (43.0%)            | 10 (15.4%)            | 0.002*           |
| Social media                                                                              | 8 (9.3%)              | 7 (10.8%)             | 0.842            |

|            |          |          |       |
|------------|----------|----------|-------|
| Television | 0        | 0        | 0.999 |
| Other      | 3 (3.5%) | 1 (1.5%) | 0.776 |

\*Significant at  $p < 0.05$  (adjusted using Benjamini-Hochberg correction)
